# Supplementary material for: Self-assembly of Schiff base anions and the trapping of HO−, O2− and Piv− bridges in a family of Ni3Ln4 complexes: synthesis, structures and magnetic properties
Source: Royal Society of Chemistry journal article supplement (doi:10.1039/d3nj01092a), 2023-01-01
Supplement: d3nj01092a1.pdf [file d3nj01092a1.pdf]

## Electronic Supplementary Information

### Self-assembly of Schiff Base Anions and Trapping of HO<sup>-</sup>, O<sup>2-</sup> and Piv<sup>-</sup> Bridges in a Family of Ni<sub>3</sub>Ln<sub>4</sub> Complexes: Synthesis, Structures and Magnetic Properties

Mousumi Biswas,<sup>a</sup> Athanasios Mavromagoulos,<sup>b</sup> Mark Murrie,<sup>b</sup> Debashis Ray\*<sup>a</sup>

<sup>a</sup>Department of Chemistry, Indian Institute of Technology, Kharagpur 721 302, India

<sup>b</sup>School of Chemistry, University of Glasgow, University Avenue, Glasgow G12 8QQ, UK

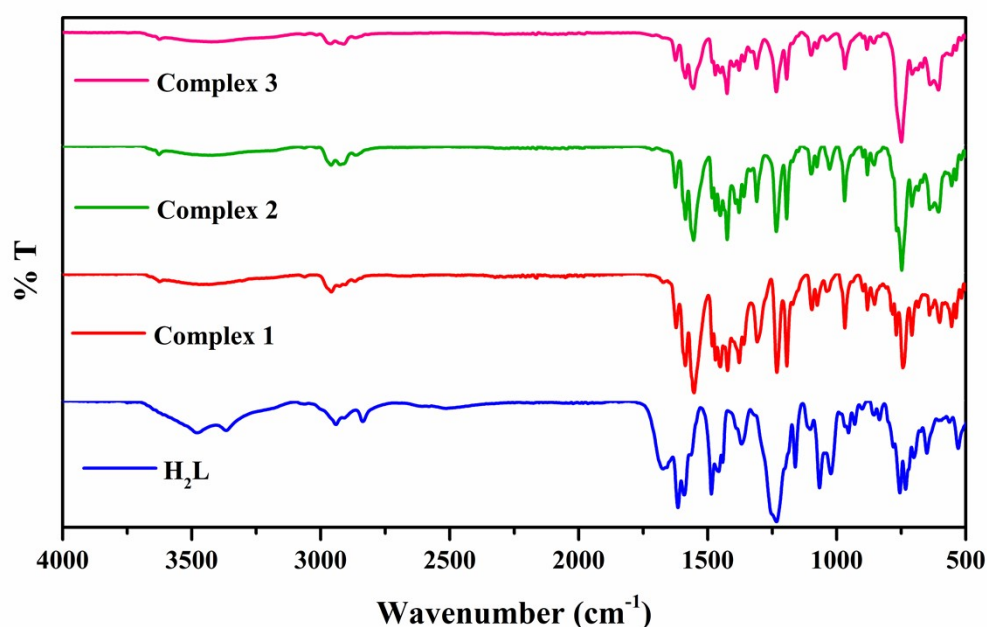

Fig. S1 FT-IR spectra of H<sub>2</sub>L and complexes 1-3

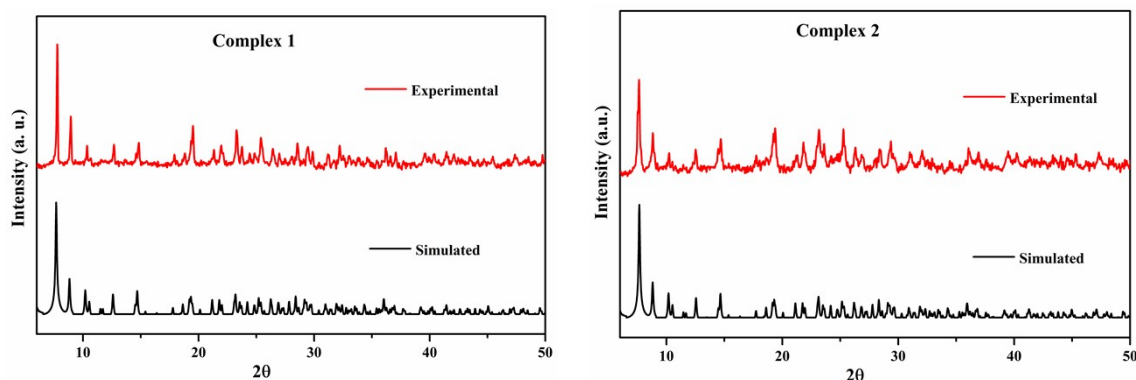

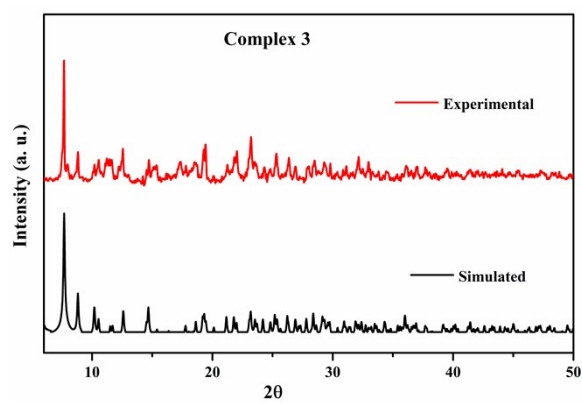

**Fig. S2** PXR D patterns of Complexes 1–3

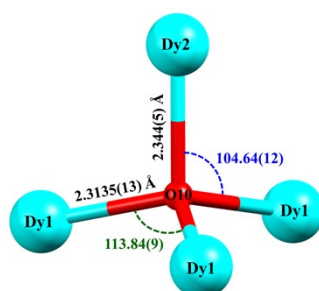

**Fig. S3** Tetrahedral (3+1 type) arrangement of four Dy<sup>III</sup> ions

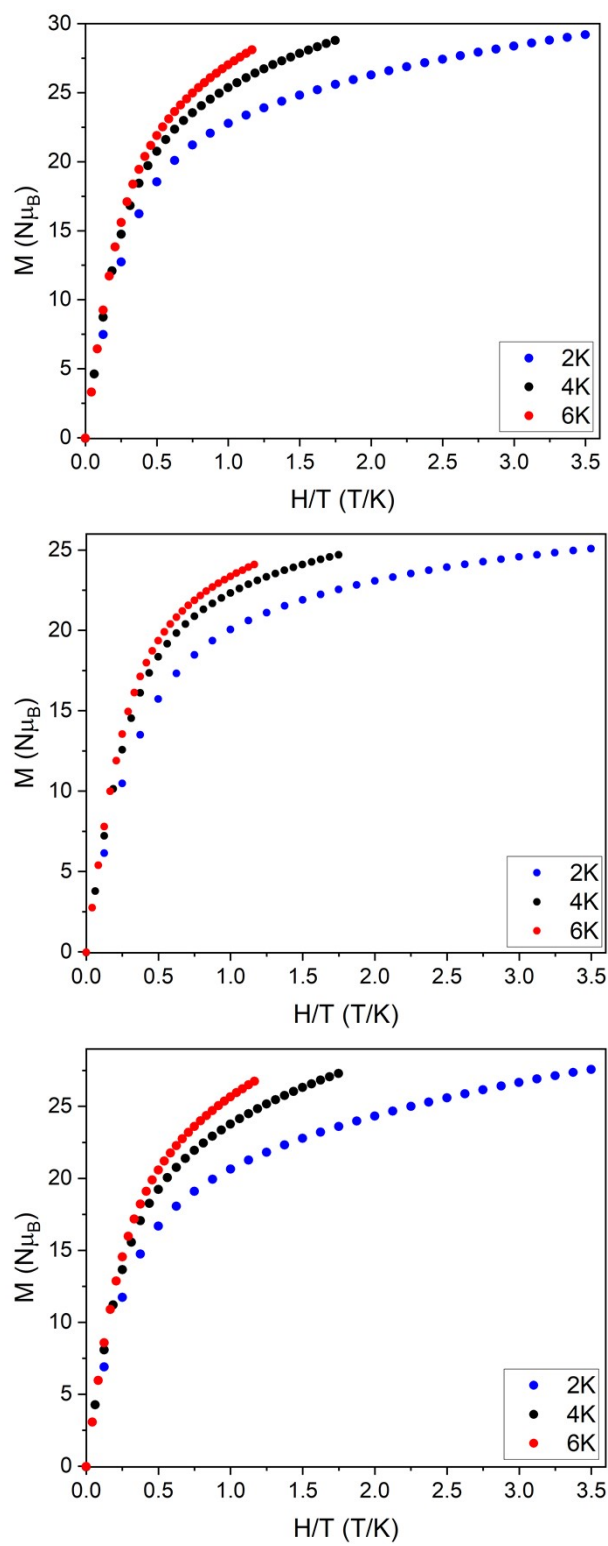

**Fig. S4.**  $M$  vs.  $H/T$  data for **1** (upper), **2** (middle) and **3** (lower).

**Table S1.** \*Continuous Shape Measures (CShM) for Ni<sup>II</sup> centres using SHAPE

| Metal centre | Structure |        |              |        |        |
|--------------|-----------|--------|--------------|--------|--------|
|              | HP-6      | PPY-6  | OC-6         | TPR-6  | JPPY-6 |
| <b>1-Ni</b>  | 30.423    | 26.569 | <b>0.534</b> | 13.950 | 30.041 |
| <b>2-Ni</b>  | 30.589    | 26.810 | <b>0.484</b> | 14.014 | 30.148 |
| <b>3-Ni</b>  | 30.368    | 26.524 | <b>0.542</b> | 13.857 | 29.946 |

\*HP-6 = Hexagon (*D6h*); PPY-6 = Pentagonal pyramid (*C5v*); OC-6 = Octahedron (*Oh*); TPR-6 = Trigonal prism (*D3h*); JPPY-6 = Johnson pentagonal pyramid J2 (*C5v*)

**Table S2.** #Continuous Shape Measures (CShM) for Ln<sup>III</sup> centres using SHAPE

| Ln <sup>3+</sup> | Structure |        |       |        |              |        |          |         |        |       |       |         |
|------------------|-----------|--------|-------|--------|--------------|--------|----------|---------|--------|-------|-------|---------|
|                  | HPY-8     | HBPY-8 | CU-8  | SAPR-8 | TDD-8        | JGBF-8 | JETBPY-8 | JBTPR-8 | BTPR-8 | JSD-8 | TT-8  | ETBPY-8 |
| <b>Dy1</b>       | 22.765    | 12.869 | 8.177 | 4.520  | <b>2.152</b> | 13.802 | 24.854   | 2.798   | 2.965  | 4.345 | 8.649 | 21.013  |
| <b>Tb1</b>       | 22.792    | 12.674 | 8.072 | 4.646  | <b>2.196</b> | 13.797 | 24.848   | 2.910   | 3.046  | 4.421 | 8.545 | 20.775  |
| <b>Ho1</b>       | 22.758    | 13.010 | 8.254 | 4.414  | <b>2.124</b> | 13.869 | 24.909   | 2.718   | 2.895  | 4.275 | 8.712 | 21.242  |

#HPY-8 = (*C7v*) Heptagonal pyramid; HBPY-8 = (*D6h*) Hexagonal bipyramid; CU-8 = (*Oh*) Cube; SAPR-8 = (*D4d*) Square antiprism; TDD-8 = (*D2d*) Triangular dodecahedron; JGBF-8 = (*D2d*) Johnson gyrobifastigium J26; JETBPY-8 = (*D3h*) Johnson elongated triangular bipyramid J14; JBTPR-8 = (*C2v*) Biaugmented trigonal prism J50; BTPR-8 = (*C2v*) Biaugmented trigonal prism; JSD-8 = (*D2d*) Snub diphenoid J84; TT-8 = (*Td*) Triakis tetrahedron; ETBPY-8 = (*D3h*) Elongated trigonal bipyramid

| Ln <sup>3+</sup> | †HP-7  | HPY-7  | PBPY-7 | COC-7        | CTPR-7 | JPBPY-7 | JETPY-7 |
|------------------|--------|--------|--------|--------------|--------|---------|---------|
| <b>Dy2</b>       | 36.490 | 19.366 | 8.303  | <b>0.343</b> | 2.168  | 12.071  | 18.251  |
| <b>Tb2</b>       | 36.606 | 19.109 | 8.319  | <b>0.362</b> | 2.188  | 12.108  | 18.422  |
| <b>Ho2</b>       | 36.429 | 19.510 | 8.293  | <b>0.313</b> | 2.140  | 12.037  | 18.220  |

†HP-7 = (*D7h*) Heptagon; HPY-7 = (*C6v*) Hexagonal pyramid; PBPY-7 = (*D5h*) Pentagonal bipyramid; COC-7 = (*C3v*) Capped octahedron; CTPR-7 = (*C2v*) Capped trigonal prism; JPBPY-7 = (*D5h*) Johnson pentagonal bipyramid J13; JETPY-7 = (*C3v*) Johnson elongated triangular pyramid J7

**Table S3.** Important bond lengths (Å) of complexes 1-3

|        | Complex 1 (Dy) | Complex 2 (Tb) | Complex 3 (Ho) |
|--------|----------------|----------------|----------------|
| Ni1–O1 | 2.016(2)       | 2.024(2)       | 2.018(2)       |
| Ni1–O3 | 2.073(2)       | 2.078(2)       | 2.074(2)       |
| Ni1–O5 | 2.013(2)       | 2.020(2)       | 2.018(2)       |

|         |            |            |           |
|---------|------------|------------|-----------|
| Ni1–O9  | 2.034(2)   | 2.033(2)   | 2.032(2)  |
| Ni1–O11 | 2.122(3)   | 2.130(4)   | 2.122(3)  |
| Ni1–N1  | 2.017(3)   | 2.022(3)   | 2.020(3)  |
|         |            |            |           |
| Ln1–O1  | 2.327(2)   | 2.340(2)   | 2.319(2)  |
| Ln1–O2  | 2.810(2)   | 2.813(2)   | 2.813(2)  |
| Ln1–O3  | 2.565(2)   | 2.579(2)   | 2.554(2)  |
| Ln1–O4  | 2.440(2)   | 2.455(2)   | 2.431(2)  |
| Ln1–O7  | 2.266(3)   | 2.287(3)   | 2.259(2)  |
| Ln1–O8  | 2.330(2)   | 2.350(3)   | 2.318(2)  |
| Ln1–O9  | 2.357(2)   | 2.378(2)   | 2.350(2)  |
| Ln1–O10 | 2.3133(10) | 2.3240(10) | 2.3069(9) |
|         |            |            |           |
| Ln2–O6  | 2.320(2)   | 2.331(2)   | 2.313(2)  |
| Ln2–O9  | 2.315(2)   | 2.333(2)   | 2.304(2)  |
| Ln2–O10 | 2.344(4)   | 2.357(4)   | 2.342(3)  |

**Table S4.** Important bond angles (°) of complexes **1-3**

|           | <b>Complex 1 (Dy)</b> | <b>Complex 2 (Tb)</b> | <b>Complex 3 (Ho)</b> |
|-----------|-----------------------|-----------------------|-----------------------|
| O1–Ln1–O2 | 58.79(7)              | 58.67(7)              | 58.87(7)              |
| O1–Ln1–O3 | 131.15(7)             | 131.04(8)             | 131.21(7)             |
| O1–Ln1–O4 | 90.21(8)              | 90.47(8)              | 89.92(8)              |
| O1–Ln1–O8 | 129.54(9)             | 129.21(9)             | 129.76(8)             |
| O1–Ln1–O9 | 69.10(7)              | 68.83(7)              | 69.26(7)              |
| O3–Ln1–O2 | 117.70(7)             | 117.90(7)             | 117.35(7)             |
| O4–Ln1–O2 | 69.77(8)              | 70.05(8)              | 69.35(8)              |
| O4–Ln1–O3 | 51.78(7)              | 51.55(7)              | 51.97(7)              |
| O7–Ln1–O1 | 79.64(9)              | 79.60(9)              | 79.50(9)              |
| O7–Ln1–O2 | 78.80(9)              | 79.53(10)             | 78.21(9)              |
| O7–Ln1–O3 | 148.99(9)             | 149.01(9)             | 149.17(8)             |
| O7–Ln1–O4 | 147.65(10)            | 148.70(10)            | 146.66(9)             |
| O7–Ln1–O8 | 82.63(10)             | 83.32(11)             | 82.19(10)             |
| O7–Ln1–O9 | 125.82(9)             | 125.19(10)            | 126.23(9)             |

|            |            |            |            |
|------------|------------|------------|------------|
| O7-Ln1-O10 | 82.37(10)  | 81.83(11)  | 82.93(10)  |
| O8-Ln1-O2  | 71.60(8)   | 71.36(9)   | 71.75(8)   |
| O8-Ln1-O3  | 78.85(8)   | 79.20(9)   | 78.53(8)   |
| O8-Ln1-O4  | 80.47(9)   | 80.24(9)   | 80.64(9)   |
| O8-Ln1-O9  | 150.81(8)  | 150.85(9)  | 150.79(8)  |
| O9-Ln1-O2  | 116.37(7)  | 115.89(7)  | 116.62(7)  |
| O9-Ln1-O3  | 72.70(7)   | 72.58(7)   | 72.89(7)   |
| O9-Ln1-O4  | 76.95(8)   | 76.65(8)   | 77.19(8)   |
| O10-Ln1-O1 | 115.81(6)  | 115.54(6)  | 116.07(6)  |
| O10-Ln1-O2 | 161.07(8)  | 161.23(8)  | 161.06 (8) |
| O10-Ln1-O3 | 80.01(6)   | 79.84(6)   | 80.22(6)   |
| O10-Ln1-O4 | 129.15(8)  | 128.72(8)  | 129.56(8)  |
| O10-Ln1-O8 | 107.97(9)  | 108.70(9)  | 107.42(9)  |
| O10-Ln1-O9 | 73.69(9)   | 73.68(10)  | 73.76(9)   |
| O6-Ln2-O6  | 85.34(10)  | 85.84(10)  | 84.96(10)  |
| O6-Ln2-O9  | 81.56(8)   | 81.33(8)   | 81.48(8)   |
| O6-Ln2-O9  | 75.11(8)   | 74.91(9)   | 75.37(8)   |
| O6-Ln2-O9  | 157.20(8)  | 157.53(8)  | 156.93(8)  |
| O9-Ln2-O9  | 112.62(4)  | 112.63(5)  | 112.67(4)  |
| O6-Ln2-O10 | 128.50(7)  | 128.16(7)  | 128.76(7)  |
| O9-Ln2-O10 | 73.89(5)   | 73.90(5)   | 73.96(5)   |
|            |            |            |            |
| O1-Ni1-O3  | 89.39(9)   | 89.29(9)   | 89.44(9)   |
| O1-Ni1-O5  | 174.39(10) | 174.52(10) | 174.31(10) |
| O1-Ni1-O9  | 81.97(8)   | 82.20(9)   | 81.85(8)   |
| O1-Ni1-O11 | 90.35(11)  | 89.03(11)  | 90.20(11)  |
| O1-Ni1-N1  | 87.86(10)  | 87.62(16)  | 87.97(10)  |
| O5-Ni1-O3  | 96.18(10)  | 96.13(10)  | 96.22(10)  |
| O9-Ni1-O3  | 88.96(8)   | 89.25(8)   | 88.82(8)   |
| O3-Ni1-O11 | 178.76(11) | 178.09(18) | 179.13(12) |
| N1-Ni1-O3  | 84.12(10)  | 84.13(10)  | 84.11(10)  |
| O5-Ni1-O9  | 98.70(9)   | 98.62(10)  | 98.71(9)   |
| O5-Ni1-O11 | 84.07(11)  | 84.54(16)  | 84.12(12)  |

|            |            |            |            |
|------------|------------|------------|------------|
| O5-Ni1-N1  | 92.09(11)  | 92.09(11)  | 92.11(11)  |
| O9-Ni1-O11 | 92.20(11)  | 91.43(19)  | 91.91(11)  |
| N1-Ni1-O9  | 167.76(10) | 167.96(10) | 167.67(10) |
| N1-Ni1-O11 | 94.66(12)  | 94.9(2)    | 95.08(12)  |
